# Supplementary material
Source: Springer Nature journal article supplement (https://www.springermedizin.de/resource/supplementary/12891_2013_1869_MOESM3_ESM.pdf/9508646)

**a**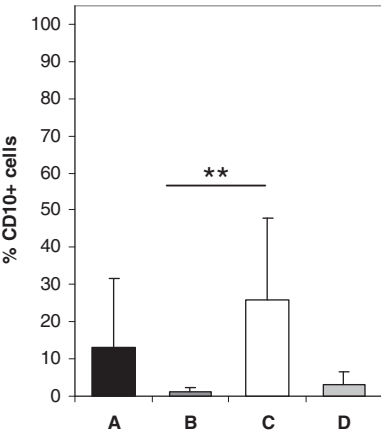**b**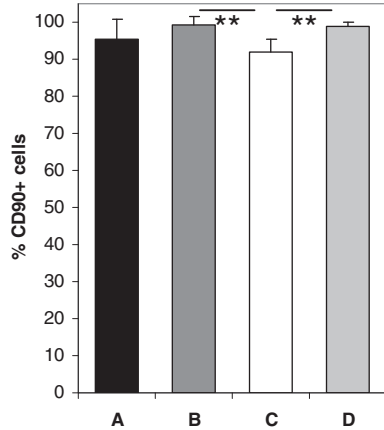**c**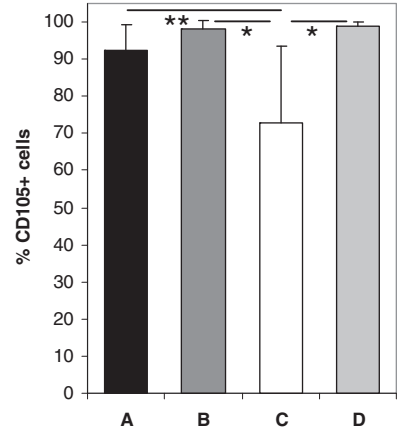**d**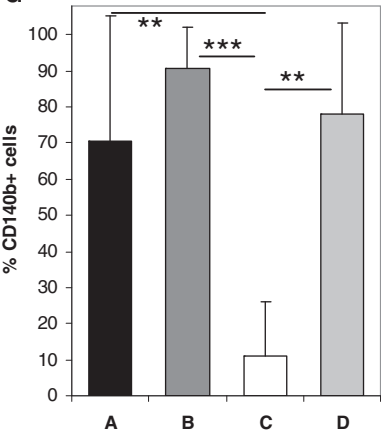**e**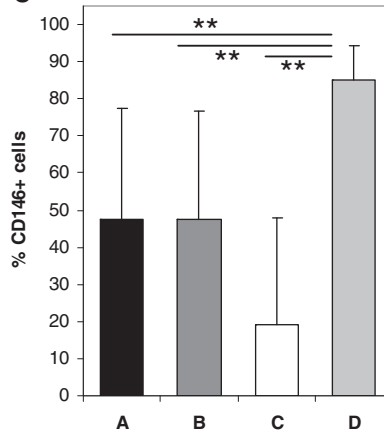**f**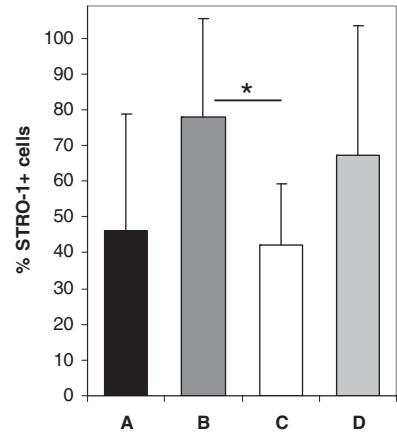

Supplement: MOESM3 [file 9508646]
